# Supplementary material for: Safety and Efficacy of Sirolimus- and Paclitaxel-Eluting Coronary Stents
Source: Atypon-hosted journal article supplement (doi:10.1056/nejmoa067193), 2007-02-13
Supplement: nejmoa067193sa1.pdf [file nejmoa067193sa1.pdf]

## Supplementary Appendix

This appendix has been provided by the authors to give readers additional information about their work.

Supplement to: Stone GW, Moses JW, Ellis SG, et al. Safety and efficacy of sirolimus- and paclitaxel-eluting coronary stents. *N Engl J Med* 2007;356:998-1008.

## Electronic (Online) Supplemental Appendix

### I. Stent Thrombosis Definitions

#### Sirolimus-eluting stent trials

RAVEL, SIRIUS, E-SIRIUS, C-SIRIUS:

Within 30 days: Angiographic documentation of stent thrombosis with associated ischemia; OR

Q-wave myocardial infarction in the in the distribution of the treated vessel without angiography; OR

Death without other obvious cause

After 30 days: Angiographic documentation of stent thrombosis with associated ischemia

SIRIUS, E-SIRIUS, C-SIRIUS also required the absence of intervening target lesion revascularization in all definitions of stent thrombosis

The clinical events committee for each trial (blinded to treatment assignment) could apply clinical judgment when adjudicating borderline or otherwise difficult to define cases

#### Paclitaxel-eluting stent trials

TAXUS-II:

Within 30 days: Angiographic documentation of a complete occlusion (TIMI flow 0 or 1) of a previously successfully treated artery (TIMI

flow 3 and residual diameter stenosis  $\leq 30\%$ ); OR

Angiographic documentation of a flow limiting thrombus (TIMI flow 1 or 2) of a previously successfully treated artery; OR

Death without other obvious cause

After 30 days: Angiographic documentation of a complete occlusion or a flow limiting thrombus of a previously successfully treated artery

TAXUS-I, -IV, -V, and –VI:

Within 30 days: Clinical presentation of an acute coronary syndrome with angiographic evidence of stent thrombosis, defined as either complete occlusion (TIMI flow 0 or 1) of a previously successfully treated artery (TIMI flow 2 to 3 and diameter stenosis  $\leq 30\%$ ) and/or a flow limiting thrombus within or adjacent to a previously successfully treated lesion; OR  
Acute myocardial infarction (Q-wave or non-Q-wave) in the distribution of the treated vessel; OR  
Death without other obvious cause

After 30 days: Clinical presentation of an acute coronary syndrome with angiographic evidence of stent thrombosis as defined above,  
OR  
Acute myocardial infarction (Q-wave or non-Q-wave) in the distribution of the treated vessel

TAXUS-IV, -V and –VI also required the absence of intervening target lesion revascularization in all definitions of stent thrombosis

The clinical events committee for each trial (blinded to treatment assignment) could apply clinical judgment when adjudicating borderline or otherwise difficult to define cases

Electronic (Online) Supplemental Appendix

II. Clinical Outcomes at 4 Years (complete results, all pre-specified intervals)

|                            | Sirolimus-eluting stent<br>(N=878) | Bare metal stent<br>(N=870) | Hazard ratio<br>[95% CI]* | P<br>value† | Paclitaxel-eluting stent<br>(N=1,755) | Bare metal stent<br>(N=1,758) | Hazard ratio<br>[95% CI]* | P<br>value† |
|----------------------------|------------------------------------|-----------------------------|---------------------------|-------------|---------------------------------------|-------------------------------|---------------------------|-------------|
| Stent thrombosis           | 1.2% (10)                          | 0.6% (5)                    | 2.00 [0.68, 5.85]         | 0.20        | 1.3% (20)‡                            | 0.9% (14)                     | 1.44 [0.73, 2.84]         | 0.30        |
| 0 - 30 days                | 0.5% (4)                           | 0.1% (1)                    | 3.98 [0.45, 35.62]        | 0.23        | 0.5% (8)                              | 0.6% (10)                     | 0.80 [0.32, 2.03]         | 0.79        |
| 30 days – 4 years          | 0.7% (6)                           | 0.5% (4)                    | 1.50 [0.42, 5.30]         | 0.57        | 0.8% (12)                             | 0.3% (4)                      | 3.03 [0.98, 9.38]         | 0.036       |
| 30 days – 1 year           | 0.1% (1)                           | 0.5% (4)                    | 0.25 [0.03, 2.22]         | 0.18        | 0.2% (4)                              | 0.1% (2)                      | 2.01 [0.37, 10.97]        | 0.28        |
| 1 year – 4 years           | 0.6% (5)                           | 0.0% (0)                    | -                         | 0.025       | 0.7% (9)                              | 0.2% (2)                      | 4.54 [0.98, 21.03]        | 0.028       |
| Death, all cause           | 6.7% (57)                          | 5.3% (45)                   | 1.27 [0.86, 1.88]         | 0.23        | 6.1% (86)                             | 6.6% (92)                     | 0.94 [0.70, 1.26]         | 0.68        |
| 0 - 30 days                | 0.1% (1)                           | 0.1% (1)                    | 0.99 [0.06, 15.86]        | 1.0         | 0.1% (2)                              | 0.3% (5)                      | 0.40 [0.08, 2.07]         | 0.43        |
| 30 days – 4 years          | 6.6% (56)                          | 5.2% (44)                   | 1.27 [0.86, 1.89]         | 0.23        | 6.0% (84)                             | 6.3% (87)                     | 0.97 [0.72, 1.31]         | 0.85        |
| 30 days – 1 year           | 1.1% (10)                          | 0.7% (6)                    | 1.66 [0.60, 4.56]         | 0.32        | 1.5% (26)                             | 1.5% (26)                     | 1.00 [0.58, 1.73]         | 0.99        |
| 1 year – 4 years           | 5.5% (46)                          | 4.6% (38)                   | 1.21 [0.79, 1.87]         | 0.37        | 4.6% (58)                             | 4.9% (61)                     | 0.96 [0.67, 1.37]         | 0.81        |
| Death, cardiac             | 3.5% (29)                          | 2.7% (23)                   | 1.26 [0.73, 2.18]         | 0.40        | 2.4% (36)                             | 3.0% (42)                     | 0.86 [0.55, 1.35]         | 0.51        |
| 0 - 30 days                | 0.1% (1)                           | 0.1% (1)                    | 0.99 [0.06, 15.86]        | 1.0         | 0.1% (2)                              | 0.3% (5)                      | 0.40 [0.08, 2.07]         | 0.43        |
| 30 days – 4 years          | 3.4% (28)                          | 2.6% (22)                   | 1.28 [0.73, 2.23]         | 0.39        | 2.3% (34)                             | 2.7% (37)                     | 0.92 [0.58, 1.47]         | 0.74        |
| 30 days – 1 year           | 0.3% (3)                           | 0.3% (3)                    | 0.99 [0.20, 4.93]         | 0.96        | 0.8% (13)                             | 0.9% (15)                     | 0.87 [0.41, 1.83]         | 0.71        |
| 1 year – 4 years           | 3.0% (25)                          | 2.3% (19)                   | 1.32 [0.73, 2.40]         | 0.36        | 1.5% (21)                             | 1.8% (22)                     | 0.96 [0.53, 1.75]         | 0.90        |
| Death, non-cardiac         | 3.3% (28)                          | 2.7% (22)                   | 1.27 [0.73, 2.23]         | 0.40        | 3.8% (50)                             | 3.7% (50)                     | 1.01 [0.68, 1.49]         | 0.98        |
| 0 - 30 days                | 0.0% (0)                           | 0.0% (0)                    | -                         | -           | 0.0% (0)                              | 0.0% (0)                      | -                         | -           |
| 30 days – 4 years          | 3.3% (28)                          | 2.7% (22)                   | 1.27 [0.73, 2.23]         | 0.40        | 3.8% (50)                             | 3.7% (50)                     | 1.01 [0.68, 1.49]         | 0.97        |
| 30 days – 1 year           | 0.8% (7)                           | 0.3% (3)                    | 2.32 [0.60, 8.96]         | 0.27        | 0.8% (13)                             | 0.6% (11)                     | 1.19 [0.53, 2.65]         | 0.68        |
| 1 year – 4 years           | 2.5% (21)                          | 2.3% (19)                   | 1.11 [0.60, 2.06]         | 0.75        | 3.1% (37)                             | 3.1% (39)                     | 0.96 [0.61, 1.50]         | 0.84        |
| Myocardial infarction, all | 6.4% (55)                          | 6.2% (53)                   | 1.03 [0.71, 1.51]         | 0.86        | 7.0% (111)                            | 6.3% (105)                    | 1.06 [0.81, 1.39]         | 0.66        |
| 0 - 30 days                | 2.5% (22)                          | 2.0% (17)                   | 1.29 [0.68, 2.42]         | 0.43        | 3.8% (66)                             | 3.1% (55)                     | 1.20 [0.84, 1.72]         | 0.31        |
| 30 days – 4 years          | 4.1% (34)                          | 4.4% (37)                   | 0.91 [0.57, 1.45]         | 0.69        | 3.6% (49)                             | 3.5% (54)                     | 0.91 [0.62, 1.34]         | 0.62        |
| 30 days – 1 year           | 1.3% (11)                          | 2.2% (19)                   | 0.57 [0.27, 1.20]         | 0.13        | 0.8% (14)                             | 1.8% (31)                     | 0.45 [0.24, 0.85]         | 0.01        |

|                                        |             |            |                    |      |             |             |                   |        |
|----------------------------------------|-------------|------------|--------------------|------|-------------|-------------|-------------------|--------|
| 1 year – 4 years                       | 2.8% (23)   | 2.2% (18)  | 1.28 [0.69, 2.37]  | 0.43 | 2.8% (36)   | 1.8% (25)   | 1.45 [0.87, 2.42] | 0.15   |
| Myocardial infarction, Q-wave          | 2.1% (18)   | 1.3% (11)  | 1.64 [0.77, 3.47]  | 0.19 | 1.4% (22)   | 1.1% (17)   | 1.30 [0.69, 2.45] | 0.42   |
| 0 - 30 days                            | 0.7% (6)    | 0.1% (1)   | 5.96 [0.72, 49.46] | 0.09 | 0.4% (7)    | 0.4% (7)    | 1.00 [0.35, 2.86] | 1.0    |
| 30 days – 4 years                      | 1.4% (12)   | 1.2% (10)  | 1.20 [0.52, 2.77]  | 0.67 | 1.1% (17)   | 0.8 (11)    | 1.55 [0.73, 3.32] | 0.25   |
| 30 days – 1 year                       | 0.6% (5)    | 0.6% (5)   | 0.99 [0.29, 3.42]  | 0.99 | 0.4% (7)    | 0.2% (3)    | 2.34 [0.61, 9.06] | 0.17   |
| 1 year – 4 years                       | 0.8% (7)    | 0.6% (5)   | 1.41 [0.45, 4.43]  | 0.56 | 0.7% (11)   | 0.6% (8)    | 1.38 [0.56, 3.44] | 0.48   |
| Myocardial infarction, non-Q-wave      | 4.5% (38)   | 5.0% (43)  | 0.88 [0.57, 1.36]  | 0.55 | 5.8% (91)   | 5.3% (90)   | 1.02 [0.76, 1.36] | 0.92   |
| 0 - 30 days                            | 1.8% (16)   | 1.8% (16)  | 0.99 [0.50, 1.99]  | 0.99 | 3.4% (59)   | 2.7% (48)   | 1.23 [0.84, 1.80] | 0.28   |
| 30 days – 4 years                      | 2.8% (23)   | 3.3% (28)  | 0.81 [0.47, 1.41]  | 0.46 | 2.6% (33)   | 2.8% (45)   | 0.73 [0.47, 1.15] | 0.17   |
| 30 days – 1 year                       | 0.7% (6)    | 1.6% (14)  | 0.42 [0.16, 1.10]  | 0.07 | 0.4% (7)    | 1.6% (28)   | 0.25 [0.11, 0.57] | <0.001 |
| 1 year – 4 years                       | 2.1% (17)   | 1.7% (14)  | 1.22 [0.60, 2.46]  | 0.59 | 2.1% (26)   | 1.3% (19)   | 1.38 [0.76, 2.49] | 0.28   |
| Death or myocardial infarction         | 11.6% (100) | 10.4% (89) | 1.12 [0.84, 1.49]  | 0.44 | 12.4% (187) | 11.8% (183) | 1.03 [0.84, 1.26] | 0.79   |
| 0 - 30 days                            | 2.6% (23)   | 2.1% (18)  | 1.27 [0.69, 2.35]  | 0.44 | 3.9% (68)   | 3.3% (58)   | 1.18 [0.83, 1.67] | 0.36   |
| 30 days – 4 years                      | 9.2% (78)   | 8.8% (75)  | 1.03 [0.75, 1.41]  | 0.86 | 9.1% (127)  | 9.2% (134)  | 0.95 [0.74, 1.21] | 0.67   |
| 30 days – 1 year                       | 2.3% (20)   | 2.8% (24)  | 0.82 [0.45, 1.49]  | 0.51 | 2.2% (38)   | 3.1% (54)   | 0.70 [0.46, 1.06] | 0.09   |
| 1 year – 4 years                       | 7.4% (62)   | 6.3% (53)  | 1.17 [0.81, 1.69]  | 0.39 | 7.1% (90)   | 6.5% (84)   | 1.08 [0.80, 1.46] | 0.60   |
| Death or Q-wave myocardial infarction  | 8.2% (70)   | 6.4% (54)  | 1.30 [0.91, 1.86]  | 0.14 | 7.3% (105)  | 7.5% (107)  | 0.99 [0.76, 1.29] | 0.93   |
| 0 - 30 days                            | 0.8% (7)    | 0.2% (2)   | 3.48 [0.72, 16.74] | 0.13 | 0.5% (9)    | 0.6% (11)   | 0.82 [0.34, 1.98] | 0.66   |
| 30 days – 4 years                      | 7.4% (63)   | 6.3% (53)  | 1.19 [0.83, 1.71]  | 0.35 | 6.9% (98)   | 7.0% (97)   | 1.02 [0.77, 1.35] | 0.90   |
| 30 days – 1 year                       | 1.6% (14)   | 1.3% (11)  | 1.26 [0.57, 2.78]  | 0.56 | 1.8% (32)   | 1.7% (29)   | 1.11 [0.67, 1.83] | 0.69   |
| 1 year – 4 years                       | 6.1% (51)   | 5.0% (42)  | 1.22 [0.81, 1.83]  | 0.34 | 5.2% (67)   | 5.4% (68)   | 0.99 [0.71, 1.39] | 0.97   |
| Cardiac death or myocardial infarction | 8.8% (75)   | 8.2% (70)  | 1.07 [0.77, 1.48]  | 0.69 | 8.9% (139)  | 8.5% (136)  | 1.03 [0.81, 1.30] | 0.82   |
| 0 - 30 days                            | 2.6% (23)   | 2.1% (18)  | 1.27 [0.69, 2.35]  | 0.44 | 3.9% (68)   | 3.3% (58)   | 1.18 [0.83, 1.67] | 0.36   |
| 30 days – 4 years                      | 6.3% (53)   | 6.5% (55)  | 0.95 [0.65, 1.39]  | 0.81 | 5.4% (77)   | 5.6% (84)   | 0.92 [0.67, 1.25] | 0.58   |
| 30 days – 1 year                       | 1.5% (13)   | 2.5% (22)  | 0.58 [0.29, 1.16]  | 0.12 | 1.4% (25)   | 2.5% (43)   | 0.58 [0.35, 0.95] | 0.03   |
| 1 year – 4 years                       | 5.2% (43)   | 4.1% (34)  | 1.27 [0.81, 1.99]  | 0.30 | 4.1% (53)   | 3.5% (45)   | 1.19 [0.80, 1.77] | 0.39   |

Values are x% (y), where x is the Kaplan-Meier estimate and y is the actual number of patients with events. Only the first event is counted within any interval. CI = confidence interval. \*Estimate calculated from a Cox proportional hazards model; † 2-sided log-rank or exact log-rank. ‡One patient had two stent thrombosis events, one before 1 year and one after 1 year.

Electronic (Online) Supplemental Appendix

III. Procedural and Follow-up Angiographic Results

|                                | Sirolimus-eluting stent | Bare metal stent | P value | Paclitaxel-eluting stent | Bare metal stent | P value |
|--------------------------------|-------------------------|------------------|---------|--------------------------|------------------|---------|
| <u>Post procedure</u>          | N=874                   | N=869            |         | N=1739                   | N=1748           |         |
| Reference vessel diameter (mm) | 2.76 ± 0.42             | 2.76 ± 0.46      | 0.98    | 2.80 ± 0.50              | 2.80 ± 0.50      | 1.0     |
| Minimal luminal diameter (mm)  |                         |                  |         |                          |                  |         |
| - In-stent                     | 2.58 ± 0.40             | 2.57 ± 0.41      | 0.48    | 2.61 ± 0.46              | 2.60 ± 0.45      | 0.57    |
| - In-segment                   | 2.28 ± 0.45             | 2.27 ± 0.46      | 0.86    | 2.18 ± 0.51              | 2.19 ± 0.51      | 0.91    |
| Diameter stenosis              |                         |                  |         |                          |                  |         |
| - In-stent (%)                 | 6.8 ± 8.3               | 7.2 ± 8.6        | 0.40    | 6.2 ± 10.3               | 6.4 ± 10.7       | 0.53    |
| - In-segment (%)               | 17.7 ± 9.8              | 17.8 ± 9.4       | 0.84    | 21.4 ± 10.3              | 21.3 ± 10.5      | 0.84    |
| Acute gain (mm)                |                         |                  |         |                          |                  |         |
| - In-stent                     | 1.64 ± 0.43             | 1.64 ± 0.43      | 0.93    | 1.70 ± 0.45              | 1.69 ± 0.44      | 0.27    |
| - In-segment                   | 1.33 ± 0.47             | 1.34 ± 0.47      | 0.74    | 1.28 ± 0.48              | 1.28 ± 0.49      | 0.76    |
| <u>Follow-up*</u>              | N=658                   | N=670            |         | N=1352                   | N=1342           |         |
| Reference vessel diameter (mm) | 2.73 ± 0.43             | 2.67 ± 0.44      | 0.01    | 2.75 ± 0.49              | 2.70 ± 0.50      | 0.005   |
| Minimal luminal diameter (mm)  |                         |                  |         |                          |                  |         |
| - In-stent                     | 2.42 ± 0.54             | 1.57 ± 0.74      | <0.001  | 2.19 ± 0.66              | 1.69 ± 0.70      | <0.001  |
| - In-segment                   | 2.09 ± 0.55             | 1.50 ± 0.67      | <0.001  | 1.95 ± 0.63              | 1.61 ± 0.65      | <0.001  |
| Diameter stenosis              |                         |                  |         |                          |                  |         |
| - In-stent (%)                 | 12.0 ± 15.0             | 41.6 ± 24.4      | <0.001  | 20.3 ± 20.1              | 37.9 ± 22.2      | <0.001  |
| - In-segment (%)               | 23.9 ± 14.7             | 44.2 ± 22.2      | <0.001  | 29.6 ± 18.2              | 41.0 ± 20.3      | <0.001  |
| Late loss (mm)                 |                         |                  |         |                          |                  |         |
| - In-stent                     | 0.14 ± 0.42             | 0.99 ± 0.66      | <0.001  | 0.41 ± 0.54              | 0.90 ± 0.59      | <0.001  |
| - In-segment                   | 0.17 ± 0.44             | 0.75 ± 0.64      | <0.001  | 0.31 ± 0.50              | 0.67 ± 0.58      | <0.001  |
| Binary restenosis              |                         |                  |         |                          |                  |         |
| - In-stent                     | 17/657 (2.6%)           | 245 (36.6%)      | <0.001  | 137/1350 (10.1%)         | 394/1340 (29.4%) | <0.001  |

|              |           |             |        |             |             |        |
|--------------|-----------|-------------|--------|-------------|-------------|--------|
| - In-segment | 42 (6.4%) | 253 (37.8%) | <0.001 | 189 (14.0%) | 425 (31.7%) | <0.001 |
|--------------|-----------|-------------|--------|-------------|-------------|--------|

\* 6 months for RAVEL, TAXUS-I and TAXUS-II; 8 months for SIRIUS, E-SIRIUS and C-SIRIUS; 9 months for TAXUS-IV, TAXUS-V and TAXUS-VI
